# Supplementary material for: Machine learning approaches improve risk stratification for secondary cardiovascular disease prevention in multiethnic patients
Source: HighWire-hosted journal article supplement (doi:10.1136/openhrt-2021-001802), 2021-10-01
Supplement: openhrt-2021-001802supp001_data_supplement.pdf [file openhrt-2021-001802supp001_data_supplement.pdf]

## Supplementary Materials.

**Supplementary Table 1. Definitions of cardiovascular diseases**

|                                    | ICD-9-CM                                                                                                                                                                                                  | ICD-10-CM                                                                                                                                                                                                                                                                                                                                                                                                                                                                                                                                                                                                      |
|------------------------------------|-----------------------------------------------------------------------------------------------------------------------------------------------------------------------------------------------------------|----------------------------------------------------------------------------------------------------------------------------------------------------------------------------------------------------------------------------------------------------------------------------------------------------------------------------------------------------------------------------------------------------------------------------------------------------------------------------------------------------------------------------------------------------------------------------------------------------------------|
| Myocardial infarction              | 410.*                                                                                                                                                                                                     | I21.*, I22.*, I23.3, I24.0, I24.9, I25.9, I51.3,                                                                                                                                                                                                                                                                                                                                                                                                                                                                                                                                                               |
| Coronary artery disease            | 411.*, 413.*, 414.*                                                                                                                                                                                       | I20.*, I23.7, I24.*, I25.*, T82.85,                                                                                                                                                                                                                                                                                                                                                                                                                                                                                                                                                                            |
| Ischemic stroke                    | 433.01, 433.11, 433.21, 433.31, 434.81, 433.91, 434.11, 434.91, 436.*                                                                                                                                     | G46.*, I63.*, I67.85, I69.30, I77.89, P91.0, Z86.73                                                                                                                                                                                                                                                                                                                                                                                                                                                                                                                                                            |
| Hemorrhagic stroke                 | 430.*, 431.*, 432.*                                                                                                                                                                                       | I60.*, I61.*, I62.*, I63.89, I67.1, P52.*, P54.8, S06.2*, S06.4*, S06.5*                                                                                                                                                                                                                                                                                                                                                                                                                                                                                                                                       |
| Atrial fibrillation, heart failure | 427.31, 428.*                                                                                                                                                                                             | I27.29, I48.0, I48.1, I48.2, I48.91, I50.*, I51.9, Z86.79                                                                                                                                                                                                                                                                                                                                                                                                                                                                                                                                                      |
| Other cardiovascular disease       | 412.* (MI), 346.6* (cerebrovascular), 433.*(cerebrovascular), 434.*(cerebrovascular), 435.* (cerebrovascular), 437.*(cerebrovascular), 438.*(cerebrovascular), 440.* (PAD), V45.81 (CAD), or V45.82 (CAD) | G43.6* (cerebrovascular), G45.* (cerebrovascular), G46.* (cerebrovascular), G81.94 (cerebrovascular), G83.9 (cerebrovascular), G93.89 (cerebrovascular), G93.9 (cerebrovascular), G95.19 (cerebrovascular), I25.1 (CAD), I25.2 (MI), I63.*(cerebrovascular), I65.* (cerebrovascular), I66.* (cerebrovascular), I67.* (cerebrovascular), I68.* (cerebrovascular), I69.* (cerebrovascular), I70.* (PAD), I72.5 (cerebrovascular), I76 (vascular), I77.75 (cerebrovascular), I77.89 (cerebrovascular), I77.9 (cerebrovascular), I99.8 (vascular), M47.01 (cerebrovascular), P91.0 (cerebrovascular), Z98.61 (CAD) |

Abbreviations: ICD-9-CM—International classification of diseases, 9<sup>th</sup> revision; ICD-10-CM—International classification of diseases, 10<sup>th</sup> revision

**Supplementary Table 2. Hyperparameters searched for the machine learning models.**

| Model | Hyperparameter    | Values                                                 |
|-------|-------------------|--------------------------------------------------------|
| LR    | C                 | 0.01, 0.1, 1, 10                                       |
| Lasso | C                 | 0.001, 0.01, 0.1, 1, 10                                |
| RF    | n_estimators      | 100, 200, 500, 1000, 2000, 4000, 5000                  |
|       | max_depth         | 3, 5, 7, 9                                             |
|       | min_samples_split | 2                                                      |
|       | max_features      | 0.5, 1                                                 |
| GBM   | n_estimators      | 20, 30, 50, 100, 200, 300, 500, 1000, 2000, 3000, 4000 |
|       | max_depth         | 3, 4, 5, 7                                             |
|       | subsample         | 0.75, 1                                                |
|       | max_features      | 0.5, 1                                                 |
| XGB   | n_estimators      | 20, 30, 50, 100, 200, 300, 500, 1000                   |
|       | max_depth         | 3, 5, 7                                                |
|       | learning_rate     | 0.3                                                    |

|  |            |        |
|--|------------|--------|
|  | reg_alpha  | 0,1,10 |
|  | reg_lambda | 0,1,10 |

Abbreviations: LR–logistic regression; Lasso–logistic regression with a lasso penalty; RF–random forest; GBM–gradient boosting machine; XGBoost–extreme gradient boosting

### Supplementary Table 3. Missingness of variables.

|                         | Missing, N (%) |
|-------------------------|----------------|
| Race                    | 5085 (15.8)    |
| HDL cholesterol         | 5966 (18.5)    |
| LDL cholesterol         | 5887 (18.3)    |
| Total cholesterol       | 5934 (18.4)    |
| Systolic BP             | 956 (3)        |
| Diastolic BP            | 960 (3)        |
| Current smoker          | 588 (1.8)      |
| Height                  | 14517 (45.1)   |
| Weight                  | 2884 (9)       |
| Median household income | 2290 (7.1)     |
| Education level         | 2287 (7.1)     |

Abbreviations: CVD – cardiovascular disease, BP – blood pressure; LDL – low density lipoprotein; HDL – high density lipoprotein

**Supplementary List 1. Complete list of all variables used in the final models.****Clinical Variables**

Age  
Female  
Race  
Weight  
Height  
HDL cholesterol  
Total cholesterol  
LDL cholesterol  
Systolic BP  
Diastolic BP  
Current smoker

**Healthcare utilization variables**

N primary care visits  
N other service visits  
N specialty care visits

**Socioeconomic variables**

Median household income  
Percent with up to an associate's degree  
Percent with up to a high school graduation  
Percent with up to some college  
Percent with up to a bachelor's degree  
Percent with up to a 9th grade education  
Percent with up to 12th grade education

**Family history variables**

Family history of emphysema

**Lab test variables**

N normal lab test results  
N abnormal lab test results  
Aspartate aminotransferase lab: normal  
Basophils lab: normal  
Bilirubin lab: normal  
Bilirubin lab: abnormal  
Urea nitrogen lab: abnormal  
Calcium lab: normal  
Eosinophils lab: normal  
Eosinophils lab: abnormal  
Fibrinogen lab: abnormal  
Glomerular filtration rate lab: abnormal  
Glucose lab: abnormal  
Potassium lab: normal  
Lymphocytes lab: abnormal  
Monocytes lab: abnormal  
Prostate specific Ag lab: normal  
Thyroxine lab: abnormal  
Albumin/Creatinine lab: abnormal  
Albumin lab: abnormal  
Protein lab: abnormal

**Medication variables**

On antihypertensive medications  
Total Medications Prescribed  
GPI4: Penicillin Combinations  
GPI4: Aminopenicillins  
GPI4: Cephalosporins - 3rd Generation  
GPI4: Erythromycins  
GPI4: Aminoglycosides  
GPI4: CMV Agents  
GPI4: Leprostatics  
GPI4: Beta Blockers Cardio-Selective  
GPI4: ACE Inhibitors  
GPI4: Angiotensin II Receptor Antagonists  
GPI4: Loop Diuretics  
GPI4: Thiazides and Thiazide-Like Diuretics  
GPI4: HMG CoA Reductase Inhibitors  
GPI4: Antihyperlipidemics - Combinations  
GPI4: Antihistamines - Non-Sedating  
GPI4: Nasal Antiallergy  
GPI4: Bulk Laxatives  
GPI4: Surfactant Laxatives  
GPI4: Antidiarrheal Combinations  
GPI4: H-2 Antagonists  
GPI4: Antipsychotics - Misc.  
GPI4: Antidementia Agents  
GPI4: Salicylates  
GPI4: Water Soluble Vitamins  
GPI4: B-Complex w/ C  
GPI4: B-Complex w/ Folic Acid  
GPI4: Vitamins w/ Lipotropics  
GPI4: Water Soluble Vitamins  
GPI4: Infant Care Products  
GPI4: Iron  
GPI4: Beta-blockers - Ophthalmic  
GPI4: Ophthalmic Immunomodulators  
GPI4: Emollient/Keratolytic Agents  
GPI4: Emollients  
GPI4: Bulk Chemicals - C's  
GPI4: Central Muscle Relaxants  
GPI4: Cough/Cold/Allergy Combinations  
GPI4: Immunosuppressive Agents

**Comorbidity variables**

History of Type 2 Diabetes  
CCS: Nonspecific chest pain  
CCS: Other and ill-defined heart disease  
CCS: Cancer of head and neck  
CCS: Aortic; peripheral; and visceral artery aneurysms  
CCS: Pancreatic disorders (not diabetes)  
CCS: Chronic kidney disease  
CCS: Chronic ulcer of skin  
CCS: Septicemia (except in labor)  
CCS: Other non-traumatic joint disorders  
CCS: Other connective tissue disease  
CCS: Nervous system congenital anomalies  
CCS: Other injuries and conditions due to external causes

CCS: Cancer of kidney and renal pelvis  
CCS: Diabetes mellitus without complication  
CCS: HIV infection  
CCS: Diabetes mellitus with complications  
CCS: Other endocrine disorders  
CCS: Deficiency and other anemia  
CCS: Diseases of white blood cells  
CCS: Other hematologic conditions  
CCS: Anxiety disorders  
CCS: Delirium, dementia, and amnestic and other cognitive disorders  
CCS: Alcohol-related disorders  
CCS: Parkinson's disease  
CCS: Other infections; including parasitic  
CCS: Epilepsy; convulsions  
CCS: Other nervous system disorders  
CCS: Heart valve disorders  
CCS: Peri-; endo-; and myocarditis; cardiomyopathy (except that caused by tuberculosis or sexually transmitted disease)  
CCS: Essential hypertension  
CCS: Hypertension with complications and secondary hypertension

**Supplementary Table 4. Performance metrics of XGBoost model in the test set of the full CVD cohort.**

| Percentage of patients | Sensitivity (%) | Specificity (%) | PPV (%) | NNE | Youden Index | F1 Score |
|------------------------|-----------------|-----------------|---------|-----|--------------|----------|
| 1%                     | 3               | 99              | 36      | 3   | 0.02         | 0.05     |
| 2%                     | 5               | 98              | 32      | 3   | 0.04         | 0.09     |
| 5%                     | 11              | 96              | 28      | 4   | 0.07         | 0.16     |
| 10%                    | 20              | 91              | 25      | 4   | 0.12         | 0.23     |
| 25%                    | 46              | 78              | 23      | 4   | 0.23         | 0.30     |
| 50%                    | 74              | 53              | 18      | 5   | 0.27         | 0.29     |
| 75%                    | 94              | 28              | 16      | 6   | 0.22         | 0.27     |
| 90%                    | 98              | 11              | 14      | 7   | 0.09         | 0.24     |
| 95%                    | 99              | 6               | 13      | 8   | 0.04         | 0.23     |
| 98%                    | 99              | 2               | 13      | 8   | 0.01         | 0.22     |
| 99%                    | 100             | 1               | 12      | 8   | 0.01         | 0.22     |

**Supplementary Table 5. Performance metrics of XGBoost model in the test set of the ASCVD cohort.**

| Percentage of patients | Sensitivity (%) | Specificity (%) | PPV (%) | NNE | Youden Index | F1 Score |
|------------------------|-----------------|-----------------|---------|-----|--------------|----------|
| 1%                     | 2               | 99              | 30      | 3   | 0.02         | 0.05     |
| 2%                     | 5               | 98              | 33      | 3   | 0.04         | 0.09     |
| 5%                     | 11              | 96              | 27      | 4   | 0.07         | 0.16     |
| 10%                    | 23              | 92              | 27      | 4   | 0.15         | 0.25     |
| 25%                    | 49              | 78              | 23      | 4   | 0.27         | 0.31     |
| 50%                    | 75              | 53              | 18      | 6   | 0.29         | 0.29     |
| 75%                    | 94              | 28              | 15      | 7   | 0.21         | 0.26     |
| 90%                    | 98              | 11              | 13      | 8   | 0.09         | 0.23     |
| 95%                    | 99              | 6               | 13      | 8   | 0.05         | 0.22     |
| 98%                    | 100             | 2               | 12      | 8   | 0.02         | 0.22     |
| 99%                    | 100             | 1               | 12      | 8   | 0.01         | 0.22     |
